# Supplementary material for: A MTA2-SATB2 chromatin complex restrains colonic plasticity toward small intestine by retaining HNF4A at colonic chromatin
Source: PubMed Central journal article supplement (PMC11055869; doi:10.1038/s41467-024-47738-y), 2024-04-27
Supplement: 41467_2024_47738_MOESM3_ESM.pdf [file 41467_2024_47738_MOESM3_ESM.pdf]

## **Description of Additional Supplementary Files**

File Name: Supplementary Data 1

Description: The Data of AP-MS and the SATB2-interacting Protein List

File Name: Supplementary Data 2

Description: Satb2 Knockout Signature Gene List

File Name: Supplementary Data 3

Description: Differential Expression Analysis Table (Mta2cKO vs Control)

File Name: Supplementary Data 4

Description: Genes Proximal to MTA2 Binding Sites in Colon (< 50 kb)

File Name: Supplementary Data 5

Description: SATB2-Interacting Proteins in Colon (MTA2 null vs control) Identified by Mass Spectrometry

File Name: Supplementary Data 6

Description: Reagent Information
